# Supplementary material for: Retrieval augmented generation based dynamic prompting for few-shot biomedical named entity recognition using large language models
Source: Research Square preprint supplement (doi:10.21203/rs.3.rs-7216581/v1), 2025-08-25
Supplement: Supplementary file 1 [file Averaged Performance of the Baseline Dynamic Prompt Model.pdf › RAG_based_Dynamic_Prompting_Supplementary_Materials/Averaged Performance of the Baseline Dynamic Prompt Model.pdf]

**A Averaged Performance of the Baseline Dynamic Prompt Model**

| Precision |         |        | Recall  | F <sub>1</sub> -score | Precision |         |         | Recall  | F <sub>1</sub> -score |
|-----------|---------|--------|---------|-----------------------|-----------|---------|---------|---------|-----------------------|
| GPT 4     | 5-shot  | 16.40  | 50.00   | 24.70                 | Llama3    | 5-shot  | 12.56   | 56.32   | 20.55                 |
|           |         | 17.67  | 50.62   | 26.20                 |           |         | 13.68   | 55.81   | 21.97                 |
|           |         | 17.48  | 53.09   | 26.30                 |           |         | 12.14   | 59.52   | 20.16                 |
|           |         | 23.91  | 54.32   | 33.20                 |           |         | 14.25   | 59.79   | 23.02                 |
|           | AVG     | 18.865 | 52.0075 | 27.60                 |           | AVG     | 13.1575 | 57.86   | 21.425                |
|           | 10-shot | 25.41  | 58.75   | 35.47                 |           | 10-shot | 24.51   | 59.52   | 34.72                 |
|           |         | 21.67  | 54.32   | 30.99                 |           |         | 19.63   | 62.35   | 29.86                 |
|           |         | 21.43  | 59.26   | 31.48                 |           |         | 23.96   | 57.44   | 33.81                 |
|           |         | 20.47  | 54.32   | 29.73                 |           |         | 21.38   | 60.43   | 31.59                 |
|           | AVG     | 22.245 | 56.6625 | 31.9175               |           | AVG     | 22.37   | 59.935  | 32.495                |
|           | 20-shot | 28.74  | 58.63   | 38.57                 |           | 20-shot | 27.22   | 57.65   | 36.98                 |
|           |         | 27.03  | 57.54   | 36.78                 |           |         | 23.24   | 52.44   | 32.21                 |
|           |         | 26.52  | 59.79   | 36.74                 |           |         | 22.12   | 52.08   | 31.06                 |
|           |         | 28.65  | 59.02   | 38.57                 |           |         | 25.49   | 53.06   | 34.44                 |
|           | AVG     | 27.735 | 58.745  | 37.665                |           | AVG     | 24.5175 | 53.8075 | 33.6725               |

**Table 1.** Averaged performance of the baseline dynamic prompt model on the REDDIT-IMPACTS dataset across different shot settings.

|       |         | Precision | Recall  | F <sub>1</sub> -score |        |         | Precision | Recall | F <sub>1</sub> -score |
|-------|---------|-----------|---------|-----------------------|--------|---------|-----------|--------|-----------------------|
| GPT 4 | 5-shot  | 69.97     | 91.43   | 79.27                 | Llama3 | 5-shot  | 68.09     | 84.35  | 75.35                 |
|       |         | 68.32     | 88.3    | 77.29                 |        |         | 69.70     | 76.67  | 73.02                 |
|       |         | 64.58     | 90.15   | 75.25                 |        |         | 71.00     | 79.15  | 74.86                 |
|       |         | 71.59     | 91.39   | 80.29                 |        |         | 67.10     | 73.25  | 70.04                 |
|       | AVG     | 68.615    | 90.3175 | 78.025                |        | AVG     | 68.9725   | 78.355 | 73.3175               |
|       | 10-shot | 75.11     | 90.84   | 82.23                 |        | 10-shot | 72.38     | 79.18  | 75.63                 |
|       |         | 74.41     | 90.32   | 81.60                 |        |         | 73.31     | 74.24  | 73.77                 |
|       |         | 74.13     | 85.71   | 79.50                 |        |         | 71.15     | 77.05  | 73.98                 |
|       |         | 77.65     | 86.35   | 81.73                 |        |         | 73.40     | 81.17  | 77.2                  |
|       | AVG     | 75.325    | 88.305  | 81.265                |        | AVG     | 72.56     | 77.91  | 75.145                |
|       | 20-shot | 75.36     | 88.33   | 81.33                 |        | 20-shot | 75.12     | 74.84  | 74.98                 |
|       |         | 73.13     | 91.74   | 81.38                 |        |         | 72.03     | 71.88  | 71.96                 |
|       |         | 71.84     | 91.1    | 80.33                 |        |         | 76.88     | 77.20  | 77.04                 |
|       |         | 77.94     | 85.54   | 81.57                 |        |         | 77.64     | 78.40  | 78.02                 |
|       | AVG     | 74.5675   | 89.1775 | 81.1525               |        | AVG     | 75.4175   | 75.58  | 75.5                  |

**Table 2.** Averaged performance of the baseline dynamic prompt model on the BC5CDR dataset across different shot settings.

|       |         | Precision | Recall  | F <sub>1</sub> -score |        |         | Precision | Recall  | F <sub>1</sub> -score |
|-------|---------|-----------|---------|-----------------------|--------|---------|-----------|---------|-----------------------|
| GPT 4 | 5-shot  | 62.38     | 63.78   | 63.07                 | Llama3 | 5-shot  | 57.69     | 68.39   | 62.58                 |
|       |         | 61.88     | 62.19   | 62.03                 |        |         | 61.83     | 61.33   | 61.58                 |
|       |         | 65.26     | 68.14   | 66.67                 |        |         | 58.24     | 68.06   | 62.77                 |
|       |         | 62.71     | 62.36   | 62.54                 |        |         | 59.44     | 71.29   | 64.82                 |
|       | AVG     | 63.0575   | 64.1175 | 63.5775               |        | AVG     | 59.3      | 67.2675 | 62.9375               |
|       | 10-shot | 66.38     | 74.24   | 70.09                 |        | 10-shot | 59.13     | 71.63   | 64.78                 |
|       |         | 68.37     | 74.86   | 71.47                 |        |         | 62.68     | 63.8    | 63.23                 |
|       |         | 66.72     | 75.33   | 70.77                 |        |         | 61.71     | 67.58   | 64.51                 |
|       |         | 66.46     | 73.34   | 69.73                 |        |         | 62.24     | 62.84   | 62.54                 |
|       | AVG     | 66.9825   | 74.4425 | 70.515                |        | AVG     | 61.44     | 66.4625 | 63.765                |
|       | 20-shot | 70.41     | 69.84   | 70.12                 |        | 20-shot | 63.89     | 62.04   | 62.95                 |
|       |         | 70.11     | 71.24   | 70.67                 |        |         | 63.96     | 62.83   | 63.39                 |
|       |         | 71.45     | 73.39   | 72.41                 |        |         | 59.22     | 61.71   | 60.44                 |
|       |         | 70.64     | 70.80   | 70.72                 |        |         | 60.96     | 61.88   | 61.42                 |
|       | AVG     | 70.6525   | 71.3175 | 70.98                 |        | AVG     | 62.0075   | 62.115  | 62.05                 |

**Table 3.** Averaged performance of the baseline dynamic prompt model on the MIMIC III dataset across different shot settings.

|       |         | Precision | Recall  | F <sub>1</sub> -score |        |         | Precision | Recall  | F <sub>1</sub> -score |
|-------|---------|-----------|---------|-----------------------|--------|---------|-----------|---------|-----------------------|
| GPT 4 | 5-shot  | 46.17     | 50.52   | 48.25                 | Llama3 | 5-shot  | 33.88     | 40.67   | 36.97                 |
|       |         | 45.69     | 49.07   | 47.32                 |        |         | 32.26     | 39.14   | 35.37                 |
|       |         | 40.24     | 43.65   | 41.88                 |        |         | 36.38     | 28.49   | 31.95                 |
|       |         | 47.96     | 52.83   | 50.28                 |        |         | 40.73     | 30.53   | 34.9                  |
|       | AVG     | 45.015    | 49.0175 | 46.9325               |        | AVG     | 35.8125   | 34.7075 | 34.7975               |
|       | 10-shot | 52.98     | 52.67   | 52.82                 |        | 10-shot | 42.79     | 31.08   | 35.66                 |
|       |         | 53.71     | 53.36   | 53.54                 |        |         | 40.18     | 28.73   | 36.27                 |
|       |         | 52.99     | 50.35   | 51.64                 |        |         | 35.75     | 32.05   | 33.76                 |
|       |         | 53.85     | 52.3    | 53.06                 |        |         | 39.95     | 34.11   | 36.71                 |
|       | AVG     | 53.3825   | 52.17   | 52.765                |        | AVG     | 39.6675   | 31.4925 | 35.6                  |
|       | 20-shot | 54.57     | 54.73   | 54.65                 |        | 20-shot | 40.59     | 42.07   | 41.32                 |
|       |         | 44.86     | 45.43   | 45.14                 |        |         | 40.87     | 42.8    | 41.81                 |
|       |         | 51.6      | 51.75   | 51.68                 |        |         | 41.48     | 43.02   | 42.24                 |
|       |         | 55.7      | 57.24   | 56.46                 |        |         | 39.88     | 42.41   | 41.1                  |
|       | AVG     | 51.6825   | 52.2875 | 51.9825               |        | AVG     | 40.705    | 42.575  | 41.6175               |

**Table 4.** Averaged performance of the baseline dynamic prompt model on the NCBI dataset across different shot settings.

|       |         | Precision | Recall  | F <sub>1</sub> -score |        |         | Precision | Recall  | F <sub>1</sub> -score |
|-------|---------|-----------|---------|-----------------------|--------|---------|-----------|---------|-----------------------|
| GPT 4 | 5-shot  | 27.24     | 62.73   | 37.99                 | Llama3 | 5-shot  | 24.94     | 73.03   | 37.18                 |
|       |         | 26.71     | 58.58   | 36.69                 |        |         | 25.95     | 61.96   | 36.58                 |
|       |         | 29.23     | 60.47   | 39.41                 |        |         | 26.11     | 73.57   | 38.54                 |
|       |         | 25.86     | 58.41   | 35.85                 |        |         | 26.55     | 59.62   | 36.74                 |
|       | AVG     | 27.26     | 60.0475 | 37.485                |        | AVG     | 25.8875   | 67.045  | 37.26                 |
|       | 10-shot | 26.92     | 58.26   | 36.82                 |        | 10-shot | 25.67     | 70.61   | 37.65                 |
|       |         | 26.1      | 59.15   | 36.22                 |        |         | 25.1      | 59.19   | 35.15                 |
|       |         | 24.41     | 58.56   | 34.46                 |        |         | 25.76     | 70.06   | 37.67                 |
|       |         | 29.19     | 60.82   | 39.45                 |        |         | 25.73     | 57.46   | 35.54                 |
|       | AVG     | 26.655    | 59.1975 | 36.7375               |        | AVG     | 25.565    | 64.33   | 36.5025               |
|       | 20-shot | 27.86     | 59.12   | 37.87                 |        | 20-shot | 26.18     | 63.59   | 37.09                 |
|       |         | 25.02     | 60.64   | 35.42                 |        |         | 26.63     | 61.14   | 37.1                  |
|       |         | 29.33     | 61.71   | 39.76                 |        |         | 25.93     | 63.57   | 36.84                 |
|       |         | 30.18     | 61.66   | 40.52                 |        |         | 27.54     | 70.85   | 39.66                 |
|       | AVG     | 28.0975   | 60.7825 | 38.3925               |        | AVG     | 26.57     | 64.7875 | 37.6725               |

**Table 5.** Averaged performance of the baseline dynamic prompt model on the Med-Mentions dataset across different shot settings.
