# Supplementary material for: Retrieval augmented generation based dynamic prompting for few-shot biomedical named entity recognition using large language models
Source: Research Square preprint supplement (doi:10.21203/rs.3.rs-7216581/v1), 2025-08-25
Supplement: Supplementary file 4 [file Results of 95% CIs for Each Metric.pdf › RAG_based_Dynamic_Prompting_Supplementary_Materials/Results of 95% CIs for Each Metric.pdf]

## B Results of 95% CIs for Each Metric

|                                            | Reddit_Impacts              | BC5CDR                      | MIMIC III                   | NCBI                        | Med-Mentions                |
|--------------------------------------------|-----------------------------|-----------------------------|-----------------------------|-----------------------------|-----------------------------|
| <b>GPT-3.5</b>                             |                             |                             |                             |                             |                             |
| <b>Basic Prompt (BP)</b>                   | 16.73 [11.53, 22.83]        | 64.56 [61.55, 67.73]        | 54.70 [49.60, 58.73]        | 26.96 [24.43, 30.98]        | 9.27 [7.81, 12.22]          |
| <b>BP + Description of datasets</b>        | 21.15 [14.88, 26.64]        | 68.61 [66.74, 70.72]        | 56.73 [52.58, 61.22]        | 34.48 [31.08, 39.25]        | 12.71 [10.93, 15.65]        |
| <b>BP + High-frequency instances</b>       | 21.15 [15.75, 27.40]        | 69.01 [66.24, 70.98]        | 57.72 [52.75, 62.26]        | 35.95 [33.36, 38.44]        | 17.22 [14.47, 19.80]        |
| <b>BP + UMLS knowledge</b>                 | 16.44 [8.43, 23.07]         | 64.83 [61.83, 66.41]        | 50.57 [46.17, 55.04]        | 30.75 [27.73, 33.26]        | 10.88 [8.81, 12.29]         |
| <b>BP + Error analysis</b>                 | 19.24 [12.91, 26.17]        | 67.67 [65.53, 70.32]        | 59.52 [54.96, 64.47]        | 33.15 [31.24, 38.87]        | 15.52 [13.14, 17.20]        |
| <b>BP + 5-shot learning with sentences</b> | 19.30 [12.26, 25.78]        | 68.84 [67.25, 70.49]        | 57.03 [53.06, 62.85]        | 40.16 [38.78, 46.45]        | 20.61 [17.58, 22.29]        |
| <b>BP + 5-shot learning with tokens</b>    | <b>21.69 [15.92, 28.89]</b> | <b>70.79 [68.87, 73.15]</b> | <b>61.21 [56.81, 66.05]</b> | <b>43.01 [41.43, 48.21]</b> | <b>24.57 [22.88, 26.64]</b> |
| <b>BP + All above</b>                      | <b>23.91 [15.87, 30.97]</b> | <b>72.73 [70.32, 74.86]</b> | <b>61.99 [57.24, 66.38]</b> | <b>45.24 [42.64, 50.58]</b> | <b>31.63 [29.36, 34.74]</b> |
| <b>GPT-4</b>                               |                             |                             |                             |                             |                             |
| <b>Basic Prompt (BP)</b>                   | 20.16 [13.29, 26.54]        | 69.43 [66.28, 72.44]        | 56.63 [51.27, 60.83]        | 33.56 [31.59, 37.25]        | 13.83 [11.85, 15.09]        |
| <b>BP + Description of datasets</b>        | 23.52 [16.46, 30.84]        | 70.65 [67.47, 72.72]        | 59.68 [55.18, 64.09]        | 35.75 [33.54, 40.58]        | 15.30 [13.61, 17.15]        |
| <b>BP + High-frequency instances</b>       | 24.64 [17.72, 31.11]        | 72.60 [71.17, 74.28]        | 60.08 [56.33, 65.37]        | 37.96 [36.95, 41.73]        | 19.50 [17.11, 22.97]        |
| <b>BP + UMLS knowledge</b>                 | 20.46 [13.84, 27.07]        | 69.86 [66.05, 72.62]        | 55.13 [50.20, 60.29]        | 30.90 [28.68, 34.30]        | 14.50 [12.57, 16.46]        |
| <b>BP + Error analysis</b>                 | 23.13 [16.65, 30.69]        | 74.61 [71.44, 77.29]        | 60.11 [55.44, 64.72]        | 37.84 [34.13, 42.71]        | 18.25 [15.06, 20.43]        |
| <b>BP + 5-shot learning with sentences</b> | 22.88 [16.23, 30.59]        | 73.00 [71.26, 76.22]        | 58.25 [53.28, 63.95]        | 40.86 [39.37, 45.36]        | 28.80 [26.71, 30.20]        |
| <b>BP + 5-shot learning with tokens</b>    | <b>25.95 [18.50, 32.07]</b> | <b>76.65 [74.15, 77.92]</b> | <b>62.94 [57.56, 66.87]</b> | <b>44.24 [42.93, 48.28]</b> | <b>33.20 [31.64, 35.70]</b> |
| <b>BP + All above</b>                      | <b>27.60 [19.43, 33.80]</b> | <b>78.03 [75.51, 80.02]</b> | <b>63.58 [58.73, 67.18]</b> | <b>46.93 [44.85, 51.58]</b> | <b>37.95 [35.88, 39.90]</b> |
| <b>Llama3</b>                              |                             |                             |                             |                             |                             |
| <b>Basic Prompt (BP)</b>                   | 15.61 [8.20, 22.12]         | 62.13 [59.24, 63.58]        | 50.70 [45.93, 54.19]        | 19.15 [15.21, 21.38]        | 21.23 [19.24, 23.42]        |
| <b>BP + Description of datasets</b>        | 19.28 [11.71, 25.96]        | 67.68 [64.86, 69.10]        | 56.22 [52.77, 60.25]        | 21.44 [20.80, 24.65]        | 21.57 [19.30, 24.76]        |
| <b>BP + High-frequency instances</b>       | <b>20.44 [13.79, 27.51]</b> | 68.39 [66.48, 70.35]        | 56.06 [52.62, 61.42]        | 26.62 [22.16, 28.31]        | 27.12 [26.37, 29.35]        |
| <b>BP + UMLS knowledge</b>                 | 12.91 [7.40, 18.71]         | 64.71 [61.44, 67.01]        | 48.92 [44.75, 53.37]        | 20.91 [17.07, 22.61]        | 23.68 [20.59, 25.17]        |
| <b>BP + Error analysis</b>                 | 18.87 [13.34, 25.13]        | 68.07 [65.41, 70.58]        | 58.92 [53.90, 63.84]        | 24.46 [20.97, 25.20]        | 25.78 [23.48, 27.56]        |
| <b>BP + 5-shot learning with sentences</b> | 17.65 [13.62, 24.69]        | 70.70 [69.36, 72.83]        | 56.85 [52.32, 61.33]        | 30.52 [26.50, 33.96]        | 34.87 [32.18, 37.25]        |
| <b>BP + 5-shot learning with tokens</b>    | 20.04 [14.81, 27.29]        | <b>71.76 [69.58, 73.51]</b> | <b>61.98 [56.59, 65.18]</b> | <b>33.42 [28.72, 35.12]</b> | <b>35.23 [33.17, 37.08]</b> |
| <b>BP + All above</b>                      | <b>21.43 [14.24, 28.80]</b> | <b>73.32 [72.27, 74.26]</b> | <b>62.94 [57.07, 65.79]</b> | <b>34.80 [28.57, 35.44]</b> | <b>37.26 [35.45, 39.08]</b> |

**Table 6.** Evaluation of static prompting strategies using GPT-3.5, GPT-4 and Llama 3 across five biomedical datasets. The table presents  $F_1$ -score with 95% confidence intervals reported for each metric to indicate the statistical reliability of the results.

|               |                | <i>Reddit_Impacts</i>       | <i>BC5CDR</i>               | <i>MIMIC III</i>            | <i>NCBI</i>                 | <i>Med-Mentions</i>         |
|---------------|----------------|-----------------------------|-----------------------------|-----------------------------|-----------------------------|-----------------------------|
| <b>GPT-4</b>  |                |                             |                             |                             |                             |                             |
| 5-shot        | <b>Base</b>    | 27.60 [19.43, 33.80]        | 78.03 [75.51, 80.02]        | 63.58 [58.73, 67.18]        | 46.93 [44.85, 51.58]        | 37.95 [35.88, 39.90]        |
|               | <b>TF-IDF</b>  | 28.47 [21.78, 35.47]        | <b>85.88 [84.53, 86.42]</b> | <b>76.24 [72.98, 79.63]</b> | <b>60.08 [56.70, 63.32]</b> | 37.96 [35.90, 39.84]        |
|               | <b>SBERT</b>   | <b>33.72 [26.28, 42.20]</b> | 83.37 [82.51, 84.22]        | 73.44 [69.91, 76.81]        | 57.56 [54.05, 60.73]        | 39.12 [36.84, 41.34]        |
|               | <b>ColBERT</b> | 32.39 [25.10, 39.85]        | 79.82 [78.24, 80.98]        | 75.56 [72.06, 78.94]        | 52.38 [49.06, 55.55]        | <b>39.93 [37.93, 41.73]</b> |
|               | <b>DPR</b>     | 32.64 [25.42, 40.17]        | 83.58 [82.30, 84.88]        | 69.89 [65.75, 73.63]        | 49.37 [45.37, 52.94]        | 39.13 [34.44, 41.35]        |
| 10-shot       | <b>Base</b>    | 31.92 [23.77, 38.44]        | 81.27 [80.81, 82.37]        | 70.52 [66.10, 73.81]        | 52.67 [49.36, 56.76]        | 36.74 [32.29, 38.83]        |
|               | <b>TF-IDF</b>  | 31.14 [24.33, 38.13]        | <b>86.64 [85.15, 88.09]</b> | 75.53 [72.18, 79.10]        | <b>62.05 [58.79, 65.11]</b> | 40.37 [38.23, 42.43]        |
|               | <b>SBERT</b>   | <b>35.47 [27.17, 43.21]</b> | 85.92 [83.09, 87.27]        | 73.89 [70.22, 77.80]        | 60.83 [57.47, 64.03]        | 40.37 [38.23, 42.39]        |
|               | <b>ColBERT</b> | 33.81 [26.24, 41.55]        | 85.71 [84.42, 86.07]        | <b>76.34 [73.01, 79.68]</b> | 57.25 [53.75, 60.72]        | <b>40.48 [38.13, 42.54]</b> |
|               | <b>DPR</b>     | 32.61 [24.50, 40.33]        | 84.79 [82.96, 86.78]        | 72.13 [68.06, 75.85]        | 58.70 [54.99, 61.91]        | 40.25 [30.83, 50.75]        |
| 20-shot       | <b>Base</b>    | 37.67 [30.04, 43.44]        | 81.15 [80.40, 82.24]        | 70.98 [65.77, 73.82]        | 51.98 [50.33, 58.84]        | 38.39 [35.26, 40.29]        |
|               | <b>TF-IDF</b>  | 38.35 [30.77, 46.28]        | 87.16 [85.77, 88.62]        | <b>77.66 [71.91, 78.88]</b> | <b>64.36 [61.18, 67.87]</b> | <b>41.32 [39.21, 43.26]</b> |
|               | <b>SBERT</b>   | 38.22 [28.57, 44.90]        | <b>87.42 [85.26, 89.12]</b> | 75.14 [71.77, 78.75]        | 62.21 [59.01, 65.18]        | 39.37 [35.05, 40.39]        |
|               | <b>ColBERT</b> | <b>42.49 [32.52, 48.33]</b> | 83.00 [81.39, 84.40]        | 76.70 [73.11, 79.89]        | 57.69 [54.22, 61.18]        | 40.53 [37.61, 43.26]        |
|               | <b>DPR</b>     | 38.84 [29.01, 44.44]        | 85.60 [84.28, 86.93]        | 72.28 [68.56, 75.95]        | 60.34 [56.54, 63.72]        | 39.23 [34.22, 41.56]        |
| <b>Llama3</b> |                |                             |                             |                             |                             |                             |
| 5-shot        | <b>Base</b>    | 21.43 [14.24, 28.80]        | 73.32 [72.27, 74.26]        | 62.94 [57.07, 65.79]        | 34.80 [28.57, 35.44]        | 37.26 [35.45, 39.08]        |
|               | <b>TF-IDF</b>  | 28.57 [21.74, 36.06]        | 80.11 [79.25, 81.00]        | 70.41 [66.87, 73.76]        | 49.80 [46.38, 53.03]        | 38.68 [35.67, 40.81]        |
|               | <b>SBERT</b>   | <b>34.42 [26.28, 41.52]</b> | <b>80.39 [79.50, 81.33]</b> | 67.88 [64.09, 71.69]        | <b>50.12 [46.89, 53.66]</b> | 37.91 [36.02, 39.81]        |
|               | <b>ColBERT</b> | 32.94 [25.00, 39.84]        | 71.76 [70.75, 72.69]        | <b>71.68 [68.08, 75.21]</b> | 45.50 [41.95, 49.49]        | <b>38.99 [36.15, 41.34]</b> |
|               | <b>DPR</b>     | 29.00 [22.86, 36.36]        | 75.67 [74.67, 76.70]        | 68.97 [65.05, 72.70]        | 44.54 [41.24, 48.25]        | 38.66 [36.78, 40.50]        |
| 10-shot       | <b>Base</b>    | 32.50 [26.94, 42.26]        | 75.15 [74.65, 76.67]        | 63.77 [58.59, 67.75]        | 35.60 [32.17, 39.12]        | 36.50 [35.73, 39.57]        |
|               | <b>TF-IDF</b>  | 34.21 [27.24, 42.03]        | <b>80.57 [79.65, 81.47]</b> | 55.56 [53.11, 60.44]        | 49.50 [46.05, 52.92]        | 35.51 [34.75, 37.45]        |
|               | <b>SBERT</b>   | 32.45 [25.33, 39.63]        | 81.17 [80.26, 82.03]        | 71.63 [67.75, 75.15]        | <b>51.35 [47.49, 55.16]</b> | <b>39.08 [36.39, 41.38]</b> |
|               | <b>ColBERT</b> | 32.89 [20.35, 35.05]        | 80.34 [79.53, 81.24]        | <b>72.85 [69.46, 76.49]</b> | 38.77 [34.91, 42.29]        | 38.06 [35.52, 40.71]        |
|               | <b>DPR</b>     | <b>34.29 [26.11, 41.98]</b> | 74.72 [73.77, 75.73]        | 69.54 [65.61, 73.17]        | 46.28 [42.77, 49.65]        | 37.85 [36.06, 39.69]        |
| 20-shot       | <b>Base</b>    | 33.67 [24.09, 40.88]        | 75.50 [73.57, 76.36]        | 62.05 [58.23, 67.15]        | 41.62 [38.83, 45.71]        | 37.67 [35.22, 40.57]        |
|               | <b>TF-IDF</b>  | 39.11 [31.34, 47.70]        | <b>78.36 [77.42, 79.30]</b> | 57.66 [51.19, 59.80]        | 47.50 [43.87, 50.84]        | <b>38.83 [37.54, 39.11]</b> |
|               | <b>SBERT</b>   | <b>41.43 [31.58, 48.98]</b> | 76.85 [74.86, 78.96]        | 65.35 [60.44, 70.40]        | 44.14 [40.57, 47.86]        | 36.01 [34.16, 37.75]        |
|               | <b>ColBERT</b> | 34.66 [24.07, 36.31]        | 72.19 [71.17, 73.20]        | 57.63 [53.19, 61.93]        | <b>48.44 [45.07, 51.78]</b> | 36.85 [34.10, 39.29]        |
|               | <b>DPR</b>     | 37.30 [27.13, 44.76]        | 74.80 [72.49, 76.36]        | <b>65.80 [61.82, 69.69]</b> | 40.36 [36.96, 43.96]        | 36.89 [34.46, 38.84]        |

**Table 7.** Evaluation of dynamic prompting strategies (5-shot, 10-shot, and 20-shot) using GPT-4 and Llama 3 across five biomedical datasets. The table presents F<sub>1</sub>-score for each retrieval method: Base Prompt, TF-IDF, SBERT, ColBERT, and DPR, with 95% confidence intervals reported for each metric to indicate the statistical reliability of the results.
